# Supplementary material for: Validating the “greenness” of chemicals via life cycle assessment: the case of anisole as an anti-solvent in perovskite solar cells
Source: Royal Society of Chemistry journal article supplement (doi:10.1039/d4su00361f), 2024-01-01
Supplement: d4su00361f1.pdf [file d4su00361f1.pdf]

This file was uploaded on 06/06/2025 to replace the file that was present with the original publication of the article.

## SUPPORTING Information

### Validating the “Greenness” of Chemicals via Life Cycle Assessment: The Case of Anisole as an Anti-solvent in Perovskite Solar Cells

A. Kamal Kamali,<sup>\*,a</sup> Nilanka M. Keppetipola,<sup>b,#</sup> Yuka Yoshihara,<sup>c</sup> Ajay Kumar Jena,<sup>d</sup> Satoshi Uchida,<sup>e</sup> Hiroshi Segawa,<sup>f</sup> Guido Sonnemann,<sup>a</sup> Thierry Toupance<sup>b</sup> and Ludmila Cojocaru<sup>\*,b,d</sup>

<sup>a</sup> Univ. Bordeaux, CNRS, Bordeaux INP, ISM, UMR 5255, Groupe Analyse du Cycle de Vie et Chimie Durable (CyVi), 351 Cours de la Libération, F-33405 Talence, Cédex, France

<sup>b</sup> Univ. Bordeaux, CNRS, Bordeaux INP, ISM, UMR 5255, Groupe Chimie Moléculaire et Matériaux (C2M), 351 Cours de la Libération, F-33405 Talence, Cédex, France

<sup>c</sup> The University of Tokyo, Department of Chemical System Engineering, Graduate School of Engineering, 7-3-1, Hongo, Bunkyo-ku, Tokyo 113-8656, Japan

<sup>d</sup> The University of Tokyo, Komaba Institute for Science, Graduate School of Arts and Sciences, 4-6-1, Komaba, Meguro, Tokyo 153-8904, Japan

<sup>e</sup> The University of Tokyo, Research Center for Advanced Science and Technology, 4-6-1, Komaba, Meguro, Tokyo 153-8904, Japan

<sup>f</sup> The University of Tokyo, Department of General Systems Studies, Graduate School of Arts and Sciences, 3-8-1, Komaba, Meguro-ku, Tokyo 153-8902, Japan

#current position : Chimie du solide et de l'énergie (CSE), UMR 8260, Collège de France, 05, Paris 75231 CEDEX, France

Synthesis of phenol from benzene (Industrial synthesis : 3 steps)<sup>1</sup>

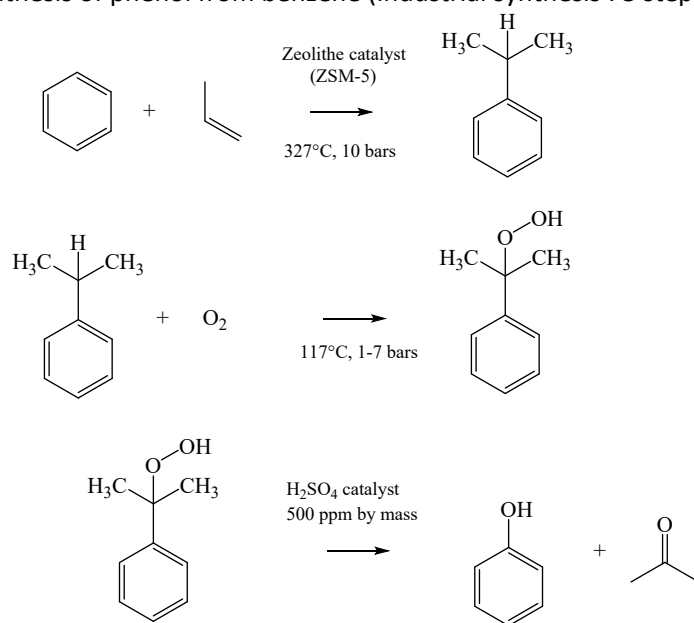

**Table S1.** Life cycle inventory for 1 kg of anisole produced in China represented by the rest-of-the-world region in the Ecoinvent database and transported to southern France for use in the laboratory synthesis of perovskite solar cells.<sup>2</sup>

| Inputs               | Quantity | Unit           | Ecoinvent Dataset                                                                                                                                     |
|----------------------|----------|----------------|-------------------------------------------------------------------------------------------------------------------------------------------------------|
| Phenol               | 1.1750   | kg             | Phenol {RoW}  market for phenol   APOS, S                                                                                                             |
| Sodium Hydroxide     | 0.5000   | kg             | Sodium hydroxide, without water, in 50% solution state {GLO}  market for   APOS, S                                                                    |
| Water                | 5.0000   | kg             | Water, deionised {RoW}  market for water, deionised   APOS, S                                                                                         |
| Dimethyl Sulfate     | 0.7875   | kg             | Dimethyl sulfate {RoW}  market for dimethyl sulfate   APOS, S                                                                                         |
| Calcium Chloride     | 0.0125   | kg             | Calcium chloride {RoW}  market for calcium chloride   APOS, S                                                                                         |
| Benzene              | 0.0879   | kg             | Benzene {GLO}  market for   APOS, S                                                                                                                   |
| Transport            | 15.8704  | tkm            | Transport, freight, sea, container ship {GLO}  market for transport, freight, sea, container ship   APOS, S                                           |
| Heating Energy       | 2.1665   | MJ             | Heat, district or industrial, natural gas {RoW}  market for heat, district or industrial, natural gas   APOS, S                                       |
| Distillation Energy  | 0.3473   | kWh            | Electricity, medium voltage {CN}  market group for   APOS, S                                                                                          |
| Outputs              | Quantity | Unit           | Ecoinvent Dataset                                                                                                                                     |
| Anisole              | 1        | kg             | N/A                                                                                                                                                   |
| Water                | 0.0050   | m <sup>3</sup> | Wastewater, average {RoW}  market for wastewater, average   APOS, S                                                                                   |
| Benzene              | 0.0879   | kg             | Benzene   emission to water   Unspecified                                                                                                             |
| Phenol, treated      | 0.3023   | kg             | Process-specific burdens, hazardous waste incineration plant {RoW}  market for process-specific burdens, hazardous waste incineration plant   APOS, S |
| Phenol, waste        | 0.0024   | kg             | Phenol   emission to water   Unspecified                                                                                                              |
| Sodium Hydroxide     | 0.1301   | kg             | Sodium Hydroxide   emission to water   Unspecified                                                                                                    |
| Dimethyl Sulfate     | 0.2043   | kg             | Dimethyl Sulfate   emission to water   Unspecified                                                                                                    |
| Sodium Sulfate       | 0.6584   | kg             | Sodium sulfate   emission to water   Unspecified                                                                                                      |
| Water                | 0.1665   | kg             | Chemically Polluted Water   emission to water   Unspecified                                                                                           |
| Calcium chloride     | 0.0125   | kg             | Calcium chloride   emission to water   Unspecified                                                                                                    |
| Anisole, end-of-life | 1        | kg             | Methoxybenzene   emission to air   Unspecified                                                                                                        |

$$Q_{react} = \frac{Q_{heat} + Q_{loss}}{\eta_{heat}} = \frac{C_p \cdot m_{mix} \cdot (T_r - T_0) + A \cdot \frac{k_a}{s} \cdot (T_r - T_{out}) \cdot t}{\eta_{heat}} \quad (Equation S1)^3$$

**Table S2.** Characteristics of a 1000-liter reactor and parameters required to calculate heating energy during anisole synthesis according to equation S1.

| Parameter                        | Symbol        | Value | Unit                                  |
|----------------------------------|---------------|-------|---------------------------------------|
| Surface area of the reactor      | $A$           | 1.271 | m <sup>2</sup>                        |
| Insulation material glass fibre  | $\kappa_a$    | 0.042 | W · m <sup>-1</sup> · K <sup>-1</sup> |
| Insulation thickness             | $s$           | 0.075 | m                                     |
| Efficiency of the heating device | $\eta_{heat}$ | 0.75  | -                                     |
| Final temperature                | $T_r$         | 363   | K                                     |
| Room temperature                 | $T_0$         | 298   | K                                     |
| Time of the reaction             | $t$           | 54000 | s                                     |
| Outside temperature              | $T_{out}$     | 298   | K                                     |

**Table S3.** Mass and specific heat capacities of precursor materials for anisole synthesis, the mass has been adjusted ensuring that the reactor is at 85% capacity.

| Material                                                     | Mass (m) [kg] | Specific Heat Capacity (C <sub>p</sub> ) [J/kg*K] |
|--------------------------------------------------------------|---------------|---------------------------------------------------|
| <i>Anisole at 90 °C for 15 hours (133.89 kg is produced)</i> |               |                                                   |
| Phenol                                                       | 157.32        | 2350.00                                           |
| Sodium Hydroxide                                             | 66.94         | 59.52                                             |
| Water                                                        | 669.43        | 4184.00                                           |

$$R_{min} = \frac{1}{\alpha - 1} \left( \frac{X_{LD}}{X_{LF}} - \frac{\alpha(1 - X_{LD})}{1 - X_{LF}} \right) \quad (\text{Equation S2})^3$$

$$Q_{dist} = \frac{Q_{heat} + Q_{vap} * (R + 1)}{\eta_{heat} - 0.1} = \frac{C_p m_{mix} (T_{boil} - T_0) + \Delta H_{vap} m_{dist} (1.2 R_{min} + 1)}{\eta_{heat} - 0.1} \quad (\text{Equation S3})^3$$

**Table S4.** Parameters used for the calculation of the distillation energy consumed during anisole synthesis according to equation S2 and S3.

| Parameter                                        | Symbol           | Value | Unit          |
|--------------------------------------------------|------------------|-------|---------------|
| Relative volatility of the solvents <sup>4</sup> | $\alpha$         | 1.94  | -             |
| Target purity of distillate (molar fraction)     | $X_{LD}$         | 0.95  | -             |
| Molar fraction of target compound in feed        | $X_{LF}$         | 0.62  | -             |
| Minimum reflux ratio                             | $R_{min}$        | 1.35  | -             |
| Enthalpy of vaporization                         | $\Delta H_{vap}$ | 0.33  | <i>MJ/mol</i> |
| Distillate mass                                  | $m_{dist}$       | 1.09  | <i>kg</i>     |
| Heat of vaporization                             | $Q_{vap}$        | 0.36  | <i>MJ</i>     |
| Energy of distillation                           | $Q_{dist}$       | 1.36  | <i>MJ</i>     |

**Table S5.** Life cycle inventory for 1 kg of monochlorobenzene produced in China represented by the rest-of-the-world region in the Ecoinvent database and transported to southern France for use in the laboratory synthesis of perovskite solar cells.

| Inputs                         | Quantity | Unit | Ecoinvent Dataset                                                                                           |
|--------------------------------|----------|------|-------------------------------------------------------------------------------------------------------------|
| Monochlorobenzene              | 1.1750   | kg   | Monochlorobenzene {RoW}  benzene chlorination   APOS, S                                                     |
| Transport                      | 0.5000   | tkm  | Transport, freight, sea, container ship {GLO}  market for transport, freight, sea, container ship   APOS, S |
| Outputs                        | Quantity | Unit | Ecoinvent Dataset                                                                                           |
| Monochlorobenzene, end-of-life | 0.7875   | kg   | 1,2-dichloro-benzene  emission to air   Unspecified                                                         |



## Materials characterization

X-ray diffraction (XRD) pattern of the perovskite films was acquired with a Bruker AXS diffractometer (D2 PHASER A26-X1-A2B0D3A) using a Cu anode ( $K\alpha$  radiation). Surface characterization of powders and thin films was performed by X-ray photoelectron spectroscopy (XPS). A K-Alpha equipment (Thermo Fisher Scientific) with a monochromatized Al  $K\alpha$  source ( $h\nu = 1486.6$  eV) was used with an X-Ray spot size 200  $\mu\text{m}$  in diameter. Perovskite thin films were stored and prepared in an  $\text{N}_2$  glovebox on an XPS transfer modulus to avoid oxygen contamination. The full spectra (0–1100 eV) were recorded with a constant pass energy of 200 eV and high-resolution spectra were recorded with a constant pass energy of 40 eV.

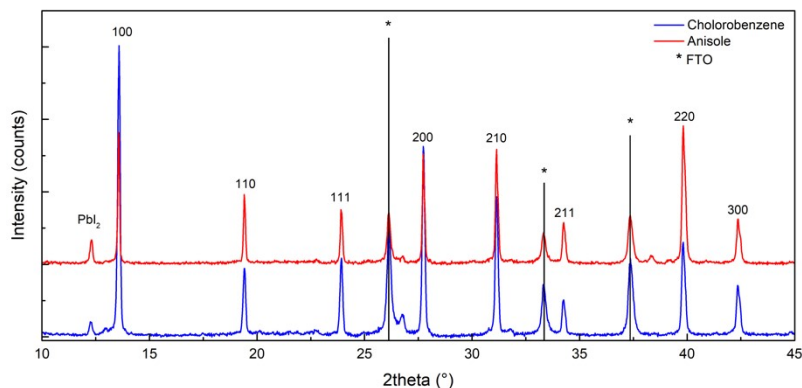

**Figure S1.** Comparison of the XRD pattern and intensities ratio of  $\text{K}_{0.025}(\text{Cs}_{0.1}\text{FA}_{0.9})_{0.975}\text{PbI}_3$  film treated with chlorobenzene (blue line and dots) or anisole (red line and dots) antisolvents.

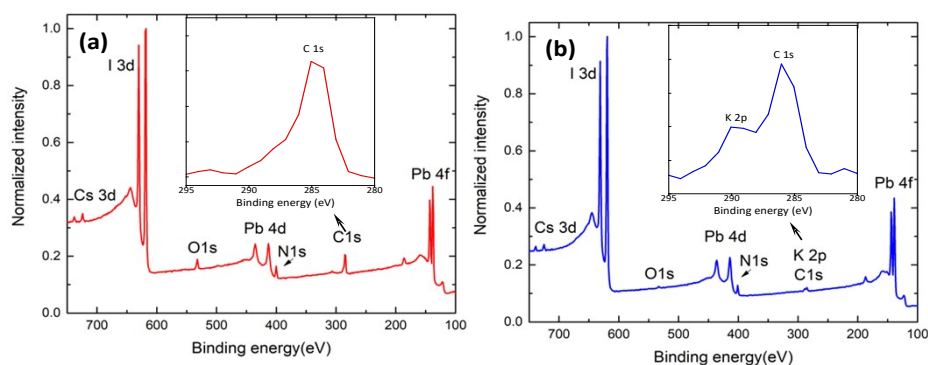

**Figure S2.** Comparison of the  $\text{K}_{0.025}(\text{Cs}_{0.1}\text{FA}_{0.9})_{0.975}\text{PbI}_3$  surface XPS analysis of antisolvent treated films with (a) anisole, and (b) chlorobenzene.

**Table S6.** Atomic percentage detected on perovskite surface prepared using chlorobenzene and anisole as antisolvent.

| Anti-solvents  | Pb4f7                 | C1s   | K2p  | N1s  | O1s  | I3d5  | Cs3d5 |
|----------------|-----------------------|-------|------|------|------|-------|-------|
|                | Atomic percentage (%) |       |      |      |      |       |       |
| Chloro-benzene | 11.45                 | 37.46 | 0.29 | 9.88 | 6.00 | 33.77 | 1.14  |
| Anisole        | 6.99                  | 54.17 | 0.00 | 7.03 | 11.2 | 20.15 | 0.48  |

**Table S7.** Photovoltaic parameters (forward scan of I-V curves) of  $K_{0.025}(Cs_{0.1}FA_{0.9})_{0.975}PbI_3$  based solar cells using different amount of chlorobenzene and anisole as antisolvent.

| Antisolvent   | Amount of antisolvent, ( $\mu$ L) | $J_{sc}$ ( $mA\ cm^{-2}$ ) | $V_{oc}$ (V)      | FF              | Average PCE, (%) |
|---------------|-----------------------------------|----------------------------|-------------------|-----------------|------------------|
| Chlorobenzene | 50                                | 20.7 $\pm$ 5.9             | 0.932 $\pm$ 0.156 | 0.61 $\pm$ 0.14 | 13.3 $\pm$ 6.4   |
|               | 100                               | 20.6 $\pm$ 7.9             | 0.832 $\pm$ 0.339 | 0.56 $\pm$ 0.21 | 12.2 $\pm$ 8.6   |
|               | 300                               | 24.9 $\pm$ 0.1             | 1.02 $\pm$ 0.12   | 0.66 $\pm$ 0.10 | 17.1 $\pm$ 3.8   |
|               | 500                               | 24.9 $\pm$ 0.46            | 1.06 $\pm$ 0.01   | 0.71 $\pm$ 0.02 | 18.8 $\pm$ 0.6   |
| Anisole       | 50                                | 16.6 $\pm$ 10.1            | 0.849 $\pm$ 0.191 | 0.53 $\pm$ 0.17 | 9.8 $\pm$ 8.5    |
|               | 100                               | 25.9 $\pm$ 0.1             | 1.06 $\pm$ 0.01   | 0.73 $\pm$ 0.01 | 20.0 $\pm$ 0.3   |
|               | 300                               | 25.7 $\pm$ 0.2             | 1.06 $\pm$ 0.01   | 0.71 $\pm$ 0.02 | 19.4 $\pm$ 0.7   |
|               | 500                               | 25.6 $\pm$ 0.2             | 1.06 $\pm$ 0.01   | 0.74 $\pm$ 0.02 | 20.1 $\pm$ 0.5   |

**Table S8.** Life cycle impact assessment results of antisolvents: anisole (A) and chlorobenzene (C) compared on a 1-to-1 (1C), 1-to-2 (2C), 1-to-5 (5C) bases.

| Impact Category                   | 1A       | 1C       | 2C       | 5C       | Unit                   |
|-----------------------------------|----------|----------|----------|----------|------------------------|
| Human toxicity, cancer            | 1.85E-08 | 4.17E-08 | 8.34E-08 | 2.08E-07 | CTUh                   |
| Human toxicity, non-cancer        | 1.15E-07 | 1.00E-07 | 2.00E-07 | 5.01E-07 | CTUh                   |
| Ecotoxicity, freshwater           | 2.13E+02 | 3.74E+02 | 7.47E+02 | 1.87E+03 | CTUe                   |
| Climate change                    | 6.20E+00 | 2.83E+00 | 5.66E+00 | 1.41E+01 | kg CO <sub>2</sub> eq  |
| Ionising radiation                | 3.16E-01 | 1.23E-01 | 2.46E-01 | 6.15E-01 | kBq U-235 eq           |
| Ozone depletion                   | 6.93E-07 | 5.91E-07 | 1.18E-06 | 2.96E-06 | kg CFC11 eq            |
| Particulate matter                | 3.56E-07 | 1.83E-07 | 3.65E-07 | 9.13E-07 | disease inc.           |
| Photochemical ozone formation     | 2.78E-02 | 2.22E-02 | 4.43E-02 | 1.11E-01 | kg NMVOC eq            |
| Water use                         | 4.27E+00 | 3.04E+00 | 6.08E+00 | 1.52E+01 | m <sup>3</sup> depriv. |
| Acidification                     | 4.13E-02 | 1.81E-02 | 3.63E-02 | 9.07E-02 | mol H <sup>+</sup> eq  |
| Eutrophication, marine            | 6.72E-03 | 3.52E-03 | 7.04E-03 | 1.76E-02 | kg N eq                |
| Eutrophication, freshwater        | 1.71E-03 | 7.00E-04 | 1.40E-03 | 3.50E-03 | kg P eq                |
| Eutrophication, terrestrial       | 7.09E-02 | 3.72E-02 | 7.45E-02 | 1.86E-01 | mol N eq               |
| Land use                          | 1.47E+01 | 4.80E+00 | 9.61E+00 | 2.40E+01 | Pt                     |
| Resource use, fossils             | 1.37E+02 | 6.84E+01 | 1.37E+02 | 3.42E+02 | MJ                     |
| Resource use, minerals and metals | 1.38E-04 | 1.25E-05 | 2.50E-05 | 6.24E-05 | kg Sb eq               |

#### References:

- 1 <https://www.essentialchemicalindustry.org/chemicals/phenol.html>
- 2 G. S. Hiers and F. D. Hager, *Org. Syn.*, Coll. 1941, **1**, 58; 1929, **9**, 12.
- 3 F. Piccinno, R. Hischer, S. Seeger and C. Som, *J. Clean. Prod.*, 2016, **135**, 1085–1097.
- 4 S. S. Yadav, N. A. Mali and S. S. Joshi, *J. Chem. Eng. Data*, 2018, **63**, 3475–3481.
